# Supplementary material for: Haematological Trends and Transfusion during Adult Extracorporeal Membrane Oxygenation: A Single Centre Study
Source: MDPI journal article supplement (doi:10.3390/jcm12072629), 2023-03-31

Supplementary Table S1:  
Indications by Diagnosis VVECMO

|                 |                                                  | VVECMO (n=46) |
|-----------------|--------------------------------------------------|---------------|
| ARDS (n=28)     | Influenza A Virus                                | 15            |
|                 | Non Influenza Respiratory Viruses                | 5             |
|                 | Bacterial ARDS                                   | 8             |
| Non ARDS (n=18) | Post-Lung transplant                             | 8             |
|                 | Bridge to Lung Transplant, Pulmonary haemorrhage | 2             |
|                 | Sepsis/Cardiomyopathy                            | 7             |
|                 | Postoperative cardiomyopathy                     | 1             |

Supplementary Table S2:  
Indications by Diagnosis VAECMO

|                        |                                     | VAECMO (n=92) |
|------------------------|-------------------------------------|---------------|
| Post Cardiotomy (n=23) | Cardiac Surgery (non-transplant)    | 21            |
|                        | Post Heart Transplant               | 2             |
| Non Cardiotomy (n=69)  | AMI Cardiogenic Shock               | 4             |
|                        | ECPR                                | 11            |
|                        | Dilated Cardiomyopathy              | 8             |
|                        | Post-partum cardiomyopathy          | 1             |
|                        | Giant Cell myocarditis              | 3             |
|                        | Myocarditis (unknown aetiology)     | 10            |
|                        | Post lung-transplant cardiomyopathy | 8             |
|                        | Unspecified Cardiomyopathy          | 8             |
|                        | ARDS                                | 2             |
|                        | Pulmonary other                     | 9             |
|                        | Sepsis                              | 5             |

Supplementary Figure S1:  
Probability of Packed red blood cell transfusion by Fibrinogen level

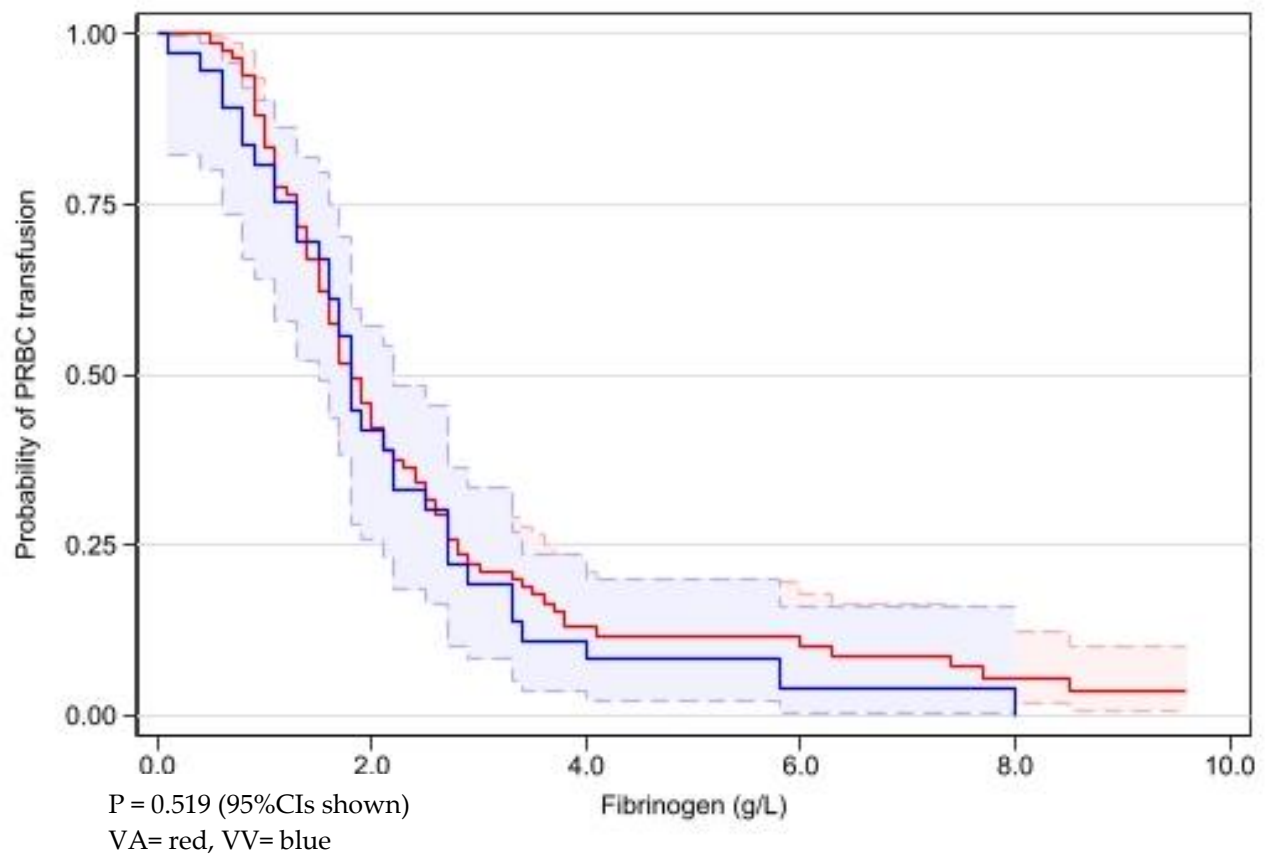

Supplement: s1 [file s1]
